# Supplementary material for: Quantum curcumin mediated inhibition of gingipains and mixed-biofilm ofPorphyromonas gingivaliscausing chronic periodontitis
Source: Royal Society of Chemistry journal article supplement (doi:10.1039/c8ra08435a), 2018-01-01
Supplement: c8ra08435a1.pdf [file c8ra08435a1.pdf]

**Quantum Curcumin mediated inhibition of gingipains and mixed-biofilm of  
*Porphyromonas gingivalis* causing chronic Periodontitis**

**Ashish Kumar Singh<sup>1,2</sup>, Shivangi Yadav<sup>1</sup>, Kavanjali Sharma<sup>3</sup>, Zeba Firdaus<sup>4</sup>, Prerana  
Aditi<sup>4</sup>, Kaushik Neogi<sup>5</sup>, Monika Bansal<sup>6</sup>, Munesh Kumar Gupta<sup>1</sup>, Asheesh Shanker<sup>7</sup>,  
Rakesh Kumar Singh<sup>2</sup>, Pradyot Prakash<sup>1\*</sup>**

**Supplementary Data Sheet**

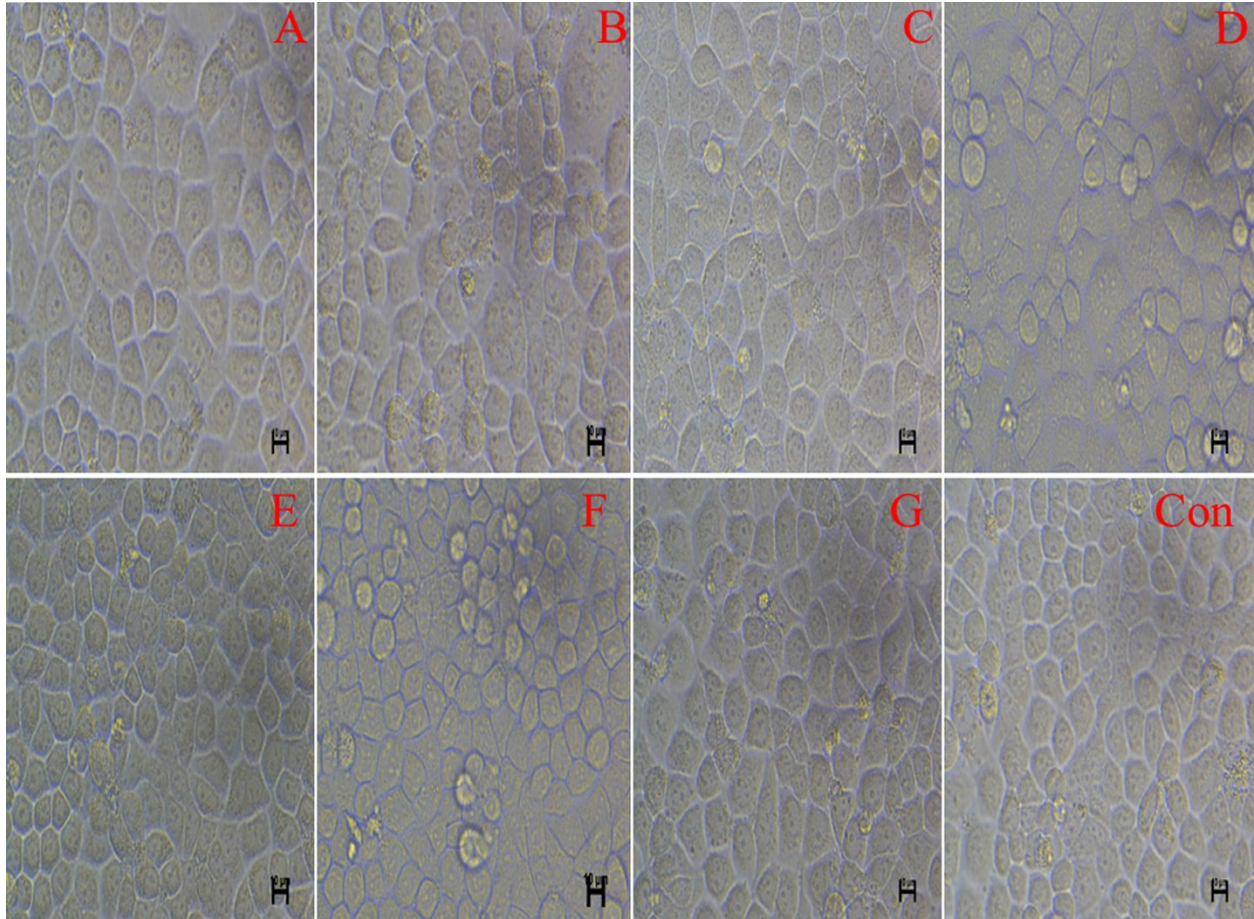

**Figure S1:** Comparative evaluation of morphology/appearances of the Vero cells after treatment with quantum curcumin.

**A**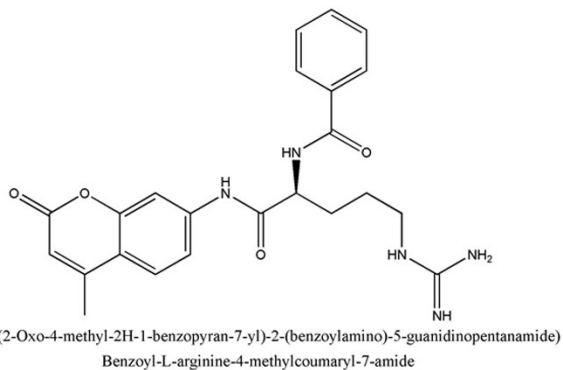**B**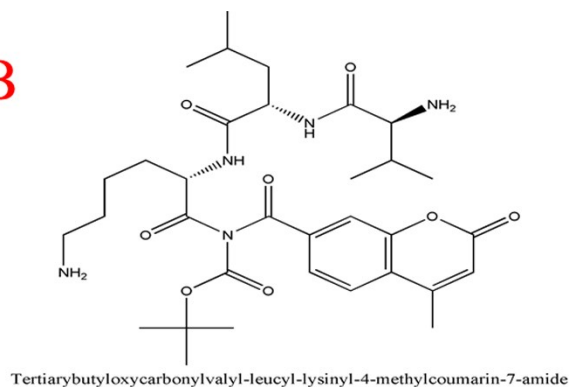**C**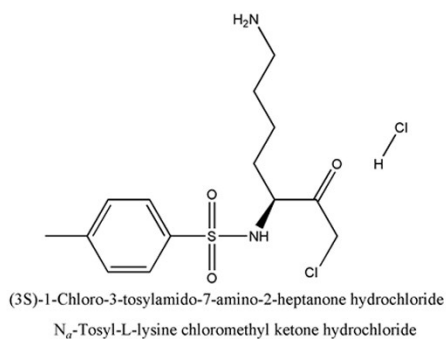**D**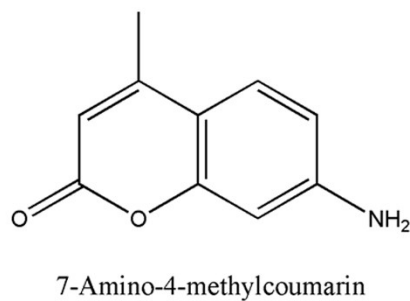

**Figure S2: Reagents utilized for *Arg*- and *Lys*- specific proteases of *P. gingivalis*.** **A.** benzoyl-L-arginine-4-methylcoumaryl-7-amide (for arginine-specific proteinase activity). **B.** *t*-butyloxycarbonyl-L-valyl-L-leucyl-L-lysine-4-methylcoumaryl-7-amide (for lysine-specific proteinase activity). **C.** Terminating reagent  $N_{\alpha}$ -*p*-tosyl-L-lysine chloromethyl ketone hydrochloride. **D.** Fluorescent reaction product (7-Amino-4-methylcoumarin)
